# Supplementary material for: Protection from neurodegeneration in the 6-hydroxydopamine (6-OHDA) model of Parkinson's with novel 1-hydroxypyridin-2-one metal chelators
Source: Royal Society of Chemistry journal article supplement (doi:10.1039/c4mt00326h), 2015-01-01
Supplement: c4mt00326h1.pdf [file c4mt00326h1.pdf]

## ELECTRONIC SUPPLEMENTARY INFORMATION

for the paper entitled

### **Protection from Neurodegeneration in the 6-Hydroxydopamine (6-OHDA) Model of Parkinson's with Novel 1-Hydroxypyridin-2-one Metal Chelators**

David G. Workman,<sup>a</sup> Andrew Tsatsanis,<sup>b</sup> Frank W. Lewis,<sup>a</sup> John P. Boyle,<sup>c</sup> Maryam Mousadoust,<sup>a</sup> Nishani T. Hettiarachchi,<sup>c</sup> Michael Hunter,<sup>a</sup> Chris S. Peers,<sup>c</sup> David Tétard<sup>\*,a</sup> and James A. Duce<sup>\*,b,d</sup>

<sup>a</sup> *Department of Applied Sciences, Faculty of Health and Life Sciences, Northumbria University, Newcastle Upon Tyne, Tyne and Wear NE1 8ST, United Kingdom. E-mail: [david.tetard@northumbria.ac.uk](mailto:david.tetard@northumbria.ac.uk)*

<sup>b</sup> *School of Biomedical Sciences, Faculty of Biological Sciences, University of Leeds, Leeds, West Yorkshire LS2 9JT, United Kingdom. E-mail: [a.tsatsanis@leeds.ac.uk](mailto:a.tsatsanis@leeds.ac.uk)*

<sup>c</sup> *LICAMM, Faculty of Medicine and Health, University of Leeds, Leeds, West Yorkshire, United Kingdom. E-mail: [c.s.peers@leeds.ac.uk](mailto:c.s.peers@leeds.ac.uk)*

<sup>d</sup> *Oxidation Biology Unit, The Florey Institute of Neuroscience and Mental Health, The University of Melbourne, Parkville, Victoria, Australia. E-mail: [j.a.duce@leeds.ac.uk](mailto:j.a.duce@leeds.ac.uk)*

|    |                              |           |
|----|------------------------------|-----------|
| 1. | <b>X-ray Crystallography</b> | <b>S3</b> |
|----|------------------------------|-----------|

## 1. X-ray Crystallography

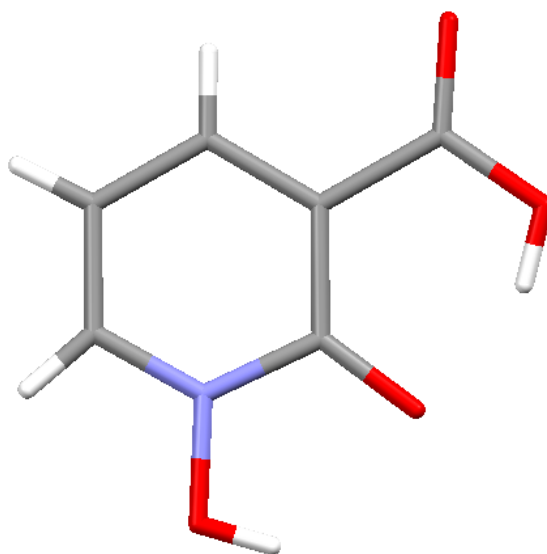

**Figure 1.** Mercury plot of acid **9**. CCDC 983801 contains the supplementary crystallographic data for this structure. These data can be obtained free of charge via [www.ccdc.cam.ac.uk/conts/retrieving.html](http://www.ccdc.cam.ac.uk/conts/retrieving.html), or from the Cambridge Crystallographic Data Centre, 12 Union Road, Cambridge CB2 1EZ, UK; fax: (+44)1223-336-033; or [deposit@ccdc.cam.ac.uk](mailto:deposit@ccdc.cam.ac.uk).

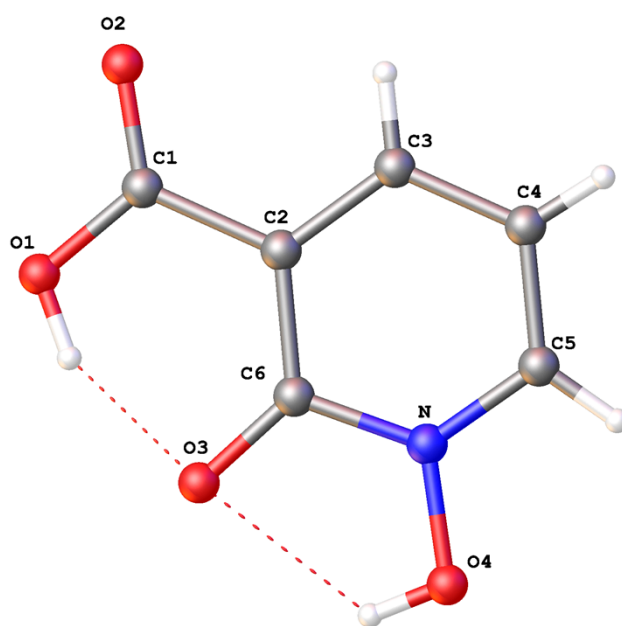

**Figure 2.** Olex 2 representation of acid **9**. Hydrogen bonds are shown by dotted lines. CCDC 983801 contains the supplementary crystallographic data for this structure. These data can be obtained free of charge via [www.ccdc.cam.ac.uk/conts/retrieving.html](http://www.ccdc.cam.ac.uk/conts/retrieving.html), or from the Cambridge Crystallographic Data Centre, 12 Union Road, Cambridge CB2 1EZ, UK; fax: (+44)1223-336-033; or [deposit@ccdc.cam.ac.uk](mailto:deposit@ccdc.cam.ac.uk).

**Table 1.** Crystal data and structure refinement for acid **9**.

|                                       |                                                                                                                      |
|---------------------------------------|----------------------------------------------------------------------------------------------------------------------|
| Chemical formula (moiety)             | C <sub>6</sub> H <sub>5</sub> NO <sub>4</sub>                                                                        |
| Chemical formula (total)              | C <sub>6</sub> H <sub>5</sub> NO <sub>4</sub>                                                                        |
| Formula weight                        | 155.11                                                                                                               |
| Temperature                           | 150(2) K                                                                                                             |
| Radiation, wavelength                 | MoK $\alpha$ , 0.71073 Å                                                                                             |
| Crystal system, space group           | orthorhombic, Pca2 <sub>1</sub>                                                                                      |
| Unit cell parameters                  | a = 15.1813(16) Å $\alpha = 90^\circ$<br>b = 3.8432(5) Å $\beta = 90^\circ$<br>c = 10.5335(14) Å $\gamma = 90^\circ$ |
| Cell volume                           | 614.57(13) Å <sup>3</sup>                                                                                            |
| Z                                     | 4                                                                                                                    |
| Calculated density                    | 1.676 g/cm <sup>3</sup>                                                                                              |
| Absorption coefficient $\mu$          | 0.144 mm <sup>-1</sup>                                                                                               |
| F(000)                                | 320                                                                                                                  |
| Crystal colour and size               | colourless, 0.34 × 0.04 × 0.04 mm <sup>3</sup>                                                                       |
| Reflections for cell refinement       | 1593 ( $\theta$ range 3.3 to 28.6°)                                                                                  |
| Data collection method                | Xcalibur, Atlas, Gemini ultra<br>thick-slice $\omega$ scans                                                          |
| $\theta$ range for data collection    | 3.3 to 28.6°                                                                                                         |
| Index ranges                          | h -18 to 19, k -5 to 4, l -14 to 12                                                                                  |
| Completeness to $\theta = 25.0^\circ$ | 99.8 %                                                                                                               |
| Reflections collected                 | 3871                                                                                                                 |
| Independent reflections               | 1255 ( $R_{\text{int}} = 0.0364$ )                                                                                   |

|                                     |                                             |
|-------------------------------------|---------------------------------------------|
| Reflections with $F^2 > 2\sigma$    | 1194                                        |
| Absorption correction               | semi-empirical from equivalents             |
| Min. and max. transmission          | 0.9526 and 0.9943                           |
| Structure solution                  | direct methods                              |
| Refinement method                   | Full-matrix least-squares on $F^2$          |
| Weighting parameters a, b           | 0.0707, 0.0988                              |
| Data / restraints / parameters      | 1255 / 1 / 121                              |
| Final R indices [ $F^2 > 2\sigma$ ] | R1 = 0.0392, wR2 = 0.1036                   |
| R indices (all data)                | R1 = 0.0416, wR2 = 0.1067                   |
| Goodness-of-fit on $F^2$            | 1.052                                       |
| Absolute structure parameter        | 2.1(13)                                     |
| Extinction coefficient              | 0.006(4)                                    |
| Largest and mean shift/su           | 0.000 and 0.000                             |
| Largest diff. peak and hole         | 0.25 and $-0.23 \text{ e } \text{\AA}^{-3}$ |

**Table 2.** Atomic coordinates and equivalent isotropic displacement parameters ( $\text{\AA}^2$ ) for ndt4.  $U_{\text{eq}}$  is defined as one third of the trace of the orthogonalized  $U^{ij}$  tensor.

|      | x           | y          | z           | $U_{\text{eq}}$ |
|------|-------------|------------|-------------|-----------------|
| O(1) | 0.12404(9)  | 0.3127(4)  | 0.38014(15) | 0.0259(4)       |
| O(2) | 0.14148(10) | 0.6051(5)  | 0.55736(17) | 0.0317(4)       |
| O(3) | 0.25619(9)  | 0.0243(4)  | 0.27351(13) | 0.0230(4)       |
| O(4) | 0.42567(10) | -0.0830(4) | 0.26178(17) | 0.0290(4)       |
| N    | 0.39057(11) | 0.1050(4)  | 0.36073(17) | 0.0199(4)       |
| C(1) | 0.17364(13) | 0.4337(6)  | 0.4733(2)   | 0.0205(5)       |
| C(2) | 0.26934(13) | 0.3524(5)  | 0.4662(2)   | 0.0180(4)       |
| C(3) | 0.32612(13) | 0.4741(6)  | 0.5582(2)   | 0.0200(4)       |
| C(4) | 0.41616(13) | 0.4040(6)  | 0.5504(2)   | 0.0222(5)       |
| C(5) | 0.44693(13) | 0.2175(6)  | 0.4494(2)   | 0.0219(5)       |
| C(6) | 0.30084(13) | 0.1545(5)  | 0.3618(2)   | 0.0183(4)       |

**Table 3.** Bond lengths [Å] and angles [°] for acid **9**.

|                 |            |                |            |
|-----------------|------------|----------------|------------|
| O(1)–H(1)       | 0.86(3)    | O(1)–C(1)      | 1.322(3)   |
| O(2)–C(1)       | 1.207(3)   | O(3)–C(6)      | 1.255(3)   |
| O(4)–H(4)       | 0.82(4)    | O(4)–N         | 1.376(2)   |
| N–C(5)          | 1.338(3)   | N–C(6)         | 1.375(3)   |
| C(1)–C(2)       | 1.488(3)   | C(2)–C(3)      | 1.379(3)   |
| C(2)–C(6)       | 1.420(3)   | C(3)–H(3)      | 0.91(3)    |
| C(3)–C(4)       | 1.396(3)   | C(4)–H(4A)     | 0.90(3)    |
| C(4)–C(5)       | 1.365(3)   | C(5)–H(5)      | 0.92(3)    |
|                 |            |                |            |
| H(1)–O(1)–C(1)  | 110(2)     | H(4)–O(4)–N    | 104(2)     |
| O(4)–N–C(5)     | 116.79(16) | O(4)–N–C(6)    | 117.55(17) |
| C(5)–N–C(6)     | 125.64(17) | O(1)–C(1)–O(2) | 120.42(18) |
| O(1)–C(1)–C(2)  | 116.43(18) | O(2)–C(1)–C(2) | 123.14(19) |
| C(1)–C(2)–C(3)  | 120.25(19) | C(1)–C(2)–C(6) | 118.71(17) |
| C(3)–C(2)–C(6)  | 121.03(17) | C(2)–C(3)–H(3) | 119.8(17)  |
| C(2)–C(3)–C(4)  | 120.4(2)   | H(3)–C(3)–C(4) | 119.9(17)  |
| C(3)–C(4)–H(4A) | 124.0(16)  | C(3)–C(4)–C(5) | 118.84(19) |
| H(4A)–C(4)–C(5) | 117.1(16)  | N–C(5)–C(4)    | 119.64(18) |
| N–C(5)–H(5)     | 110.3(17)  | C(4)–C(5)–H(5) | 130.0(17)  |
| O(3)–C(6)–N     | 118.26(19) | O(3)–C(6)–C(2) | 127.27(17) |
| N–C(6)–C(2)     | 114.47(16) |                |            |



**Table 4.** Anisotropic displacement parameters ( $\text{\AA}^2$ ) for acid **9**. The anisotropic displacement factor exponent takes the form:  $-2\pi^2[h^2a^{*2}U^{11} + \dots + 2hka^*b^*U^{12}]$ .

|      | $U^{11}$  | $U^{22}$   | $U^{33}$   | $U^{23}$   | $U^{13}$   | $U^{12}$   |
|------|-----------|------------|------------|------------|------------|------------|
| O(1) | 0.0146(7) | 0.0382(9)  | 0.0249(8)  | -0.0068(8) | -0.0019(7) | 0.0016(6)  |
| O(2) | 0.0165(6) | 0.0470(11) | 0.0315(9)  | -0.0122(8) | -0.0017(7) | 0.0074(7)  |
| O(3) | 0.0187(6) | 0.0303(8)  | 0.0201(8)  | -0.0035(7) | -0.0036(6) | 0.0015(5)  |
| O(4) | 0.0173(7) | 0.0432(10) | 0.0264(8)  | -0.0115(9) | 0.0001(7)  | 0.0052(6)  |
| N    | 0.0155(7) | 0.0241(9)  | 0.0200(8)  | -0.0004(8) | 0.0016(7)  | 0.0025(6)  |
| C(1) | 0.0146(8) | 0.0263(10) | 0.0206(10) | 0.0010(9)  | -0.0012(8) | -0.0001(8) |
| C(2) | 0.0141(8) | 0.0196(9)  | 0.0205(10) | 0.0027(9)  | -0.0002(8) | 0.0002(7)  |
| C(3) | 0.0186(9) | 0.0211(10) | 0.0202(10) | 0.0000(9)  | 0.0000(8)  | 0.0000(8)  |
| C(4) | 0.0160(9) | 0.0259(11) | 0.0247(10) | 0.0015(9)  | -0.0044(9) | -0.0025(8) |
| C(5) | 0.0134(9) | 0.0254(11) | 0.0269(10) | 0.0025(10) | -0.0015(8) | -0.0013(8) |
| C(6) | 0.0140(8) | 0.0199(9)  | 0.0210(10) | 0.0037(9)  | -0.0014(8) | -0.0006(7) |

**Table 5.** Hydrogen coordinates and isotropic displacement parameters ( $\text{\AA}^2$ )  
for acid **9**.

|       | x          | y         | z        | U        |
|-------|------------|-----------|----------|----------|
| H(1)  | 0.156(2)   | 0.188(8)  | 0.330(3) | 0.041(9) |
| H(4)  | 0.383(2)   | -0.130(8) | 0.218(3) | 0.042(9) |
| H(3)  | 0.3048(17) | 0.605(6)  | 0.624(3) | 0.024(6) |
| H(4A) | 0.4560(18) | 0.481(7)  | 0.606(2) | 0.025(6) |
| H(5)  | 0.5040(19) | 0.160(6)  | 0.427(3) | 0.026(7) |

**Table 6.** Torsion angles [°] for acid **9**.

|                     |           |                     |             |
|---------------------|-----------|---------------------|-------------|
| O(1)–C(1)–C(2)–C(3) | 178.8(2)  | O(1)–C(1)–C(2)–C(6) | 0.1(3)      |
| O(2)–C(1)–C(2)–C(3) | –0.1(3)   | O(2)–C(1)–C(2)–C(6) | –178.7(2)   |
| C(1)–C(2)–C(3)–C(4) | –178.7(2) | C(6)–C(2)–C(3)–C(4) | –0.1(3)     |
| C(2)–C(3)–C(4)–C(5) | 0.9(3)    | O(4)–N–C(5)–C(4)    | –179.67(19) |
| C(6)–N–C(5)–C(4)    | –1.3(3)   | C(3)–C(4)–C(5)–N    | –0.3(3)     |
| O(4)–N–C(6)–O(3)    | 0.5(3)    | O(4)–N–C(6)–C(2)    | –179.65(17) |
| C(5)–N–C(6)–O(3)    | –177.9(2) | C(5)–N–C(6)–C(2)    | 2.0(3)      |
| C(1)–C(2)–C(6)–O(3) | –2.7(3)   | C(1)–C(2)–C(6)–N    | 177.41(18)  |
| C(3)–C(2)–C(6)–O(3) | 178.7(2)  | C(3)–C(2)–C(6)–N    | –1.2(3)     |

**Table 7.** Hydrogen bonds for acid **9** [ $\text{\AA}$  and  $^\circ$ ].

| D–H...A           | d(D–H)  | d(H...A) | d(D...A) | $\angle(\text{DHA})$ |
|-------------------|---------|----------|----------|----------------------|
| O(1)–H(1)...O(3)  | 0.86(3) | 1.75(3)  | 2.552(2) | 153(3)               |
| O(4)–H(4)...O(2A) | 0.82(4) | 2.01(3)  | 2.667(2) | 137(3)               |
| O(4)–H(4)...O(3)  | 0.82(4) | 2.10(4)  | 2.609(2) | 120(3)               |

Symmetry operations for equivalent atoms

A  $-x+1/2, y-1, z-1/2$
